# Supplementary material for: Abundance profiling of specific gene groups using precomputed gut metagenomes yields novel biological hypotheses
Source: PLoS One. 2017 Apr 27;12(4):e0176154. doi: 10.1371/journal.pone.0176154 (PMC5407692; doi:10.1371/journal.pone.0176154)
Supplement: S1 Table — (CSV) [file pone.0176154.s005.csv]

Sample description	Group tag	Reference	Number of samples
healthy russians individuals	RUS	[Tyakht 2013]	96
3 additional Russian samples	RUS_plus	-	3
healthy american individuals	USA	[HMP]	138
healthy chinese individuals	CHI	[Qin 2012]	70
healthy danish individuals	DEN_control	[Le Chatelier 2013]	123
danish individuals with obesity	DEN_obese	[Le Chatelier 2013]	169
healthy spanish individuals	SPN_control	[Nielson 2014]	59
spanish individuals with ulcerative colitis	SPN_UC	[Nielson 2014]	107
panish individuals with Crohn's disease	SPN_CD	[Nielson 2014]	19
